# Supplementary material for: Implementation of Spiegler–Kedem and Steric Hindrance Pore Models for Analyzing Nanofiltration Membrane Performance for Smart Water Production
Source: PubMed Central journal article supplement (PMC6160980; doi:10.3390/membranes8030078), 2018-09-06
Supplement: membranes-08-00078-s001.pdf [file membranes-08-00078-s001.pdf]

*Supplementary Materials*

# Implementation of Spiegler–Kedem and Steric Hindrance Pore Models for Analyzing Nanofiltration Membrane Performance for Smart Water Production

**Remya R. Nair <sup>1,\*</sup>, Evgenia Protasova <sup>1</sup>, Skule Strand <sup>2</sup> and Torleiv Bilstad <sup>1</sup>**

<sup>1</sup> Department of Chemistry, Bioscience and Environmental Engineering, University of Stavanger, Kjell Arholmsgate 41, 4036 Stavanger, Norway; evgy.pro@gmail.com (E.P.); torleiv.bilstad@uis.no (T.B.)

<sup>2</sup> Department of Energy and Petroleum Engineering, University of Stavanger, Kjell Arholmsgate 41, 4036 Stavanger, Norway; skule.strand@uis.no

\* Correspondence: remya.nair@uis.no

Received: 8 August 2018; Accepted: 31 August 2018; Published: date

## Sodium Rejection Versus Flux for Six Nf Membranes Fitted with Spiegler–Kedem Model

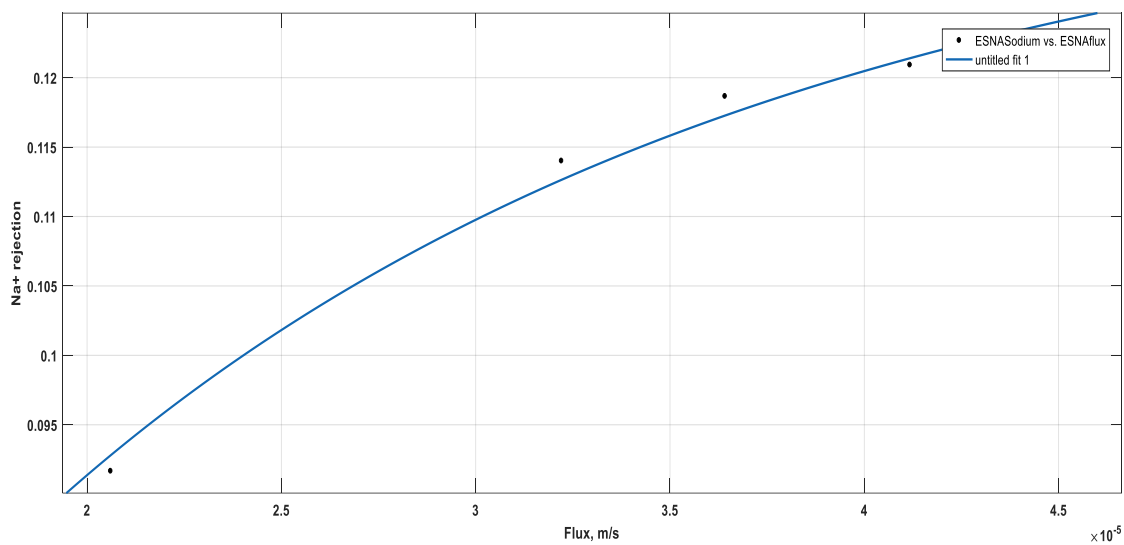

Figure S1. Rejection versus flux for Na<sup>+</sup> for ESNA fitted using Spiegler–Kedem model.

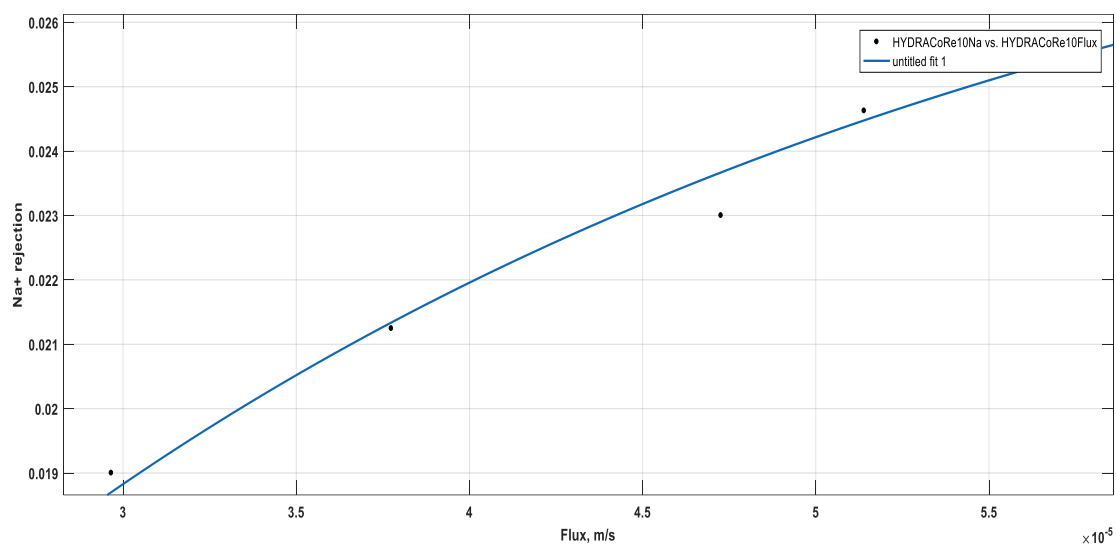

Figure S2. Rejection versus flux for Na<sup>+</sup> for HYDRACoRe10 fitted using Spiegler–Kedem model.

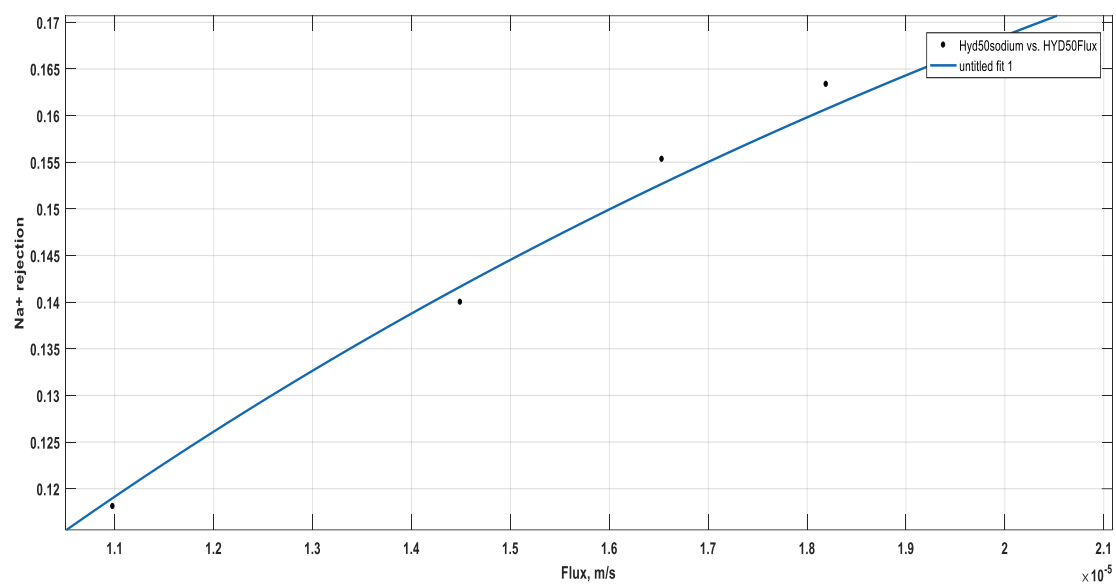

Figure S3. Rejection versus flux for Na<sup>+</sup> for HYDRACoRe50.

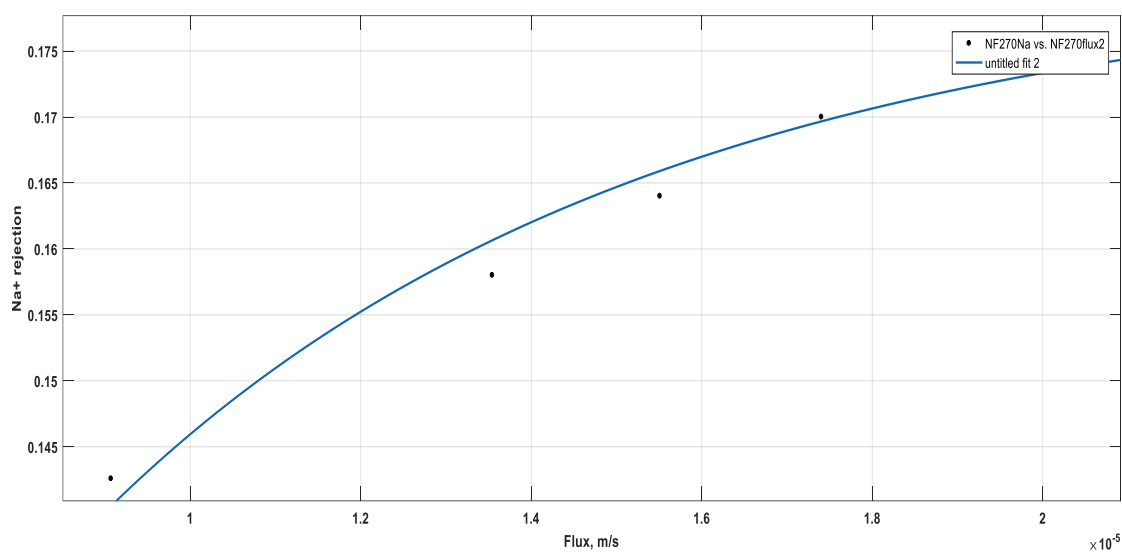

Figure S4. Rejection versus flux for Na<sup>+</sup> for NF270.

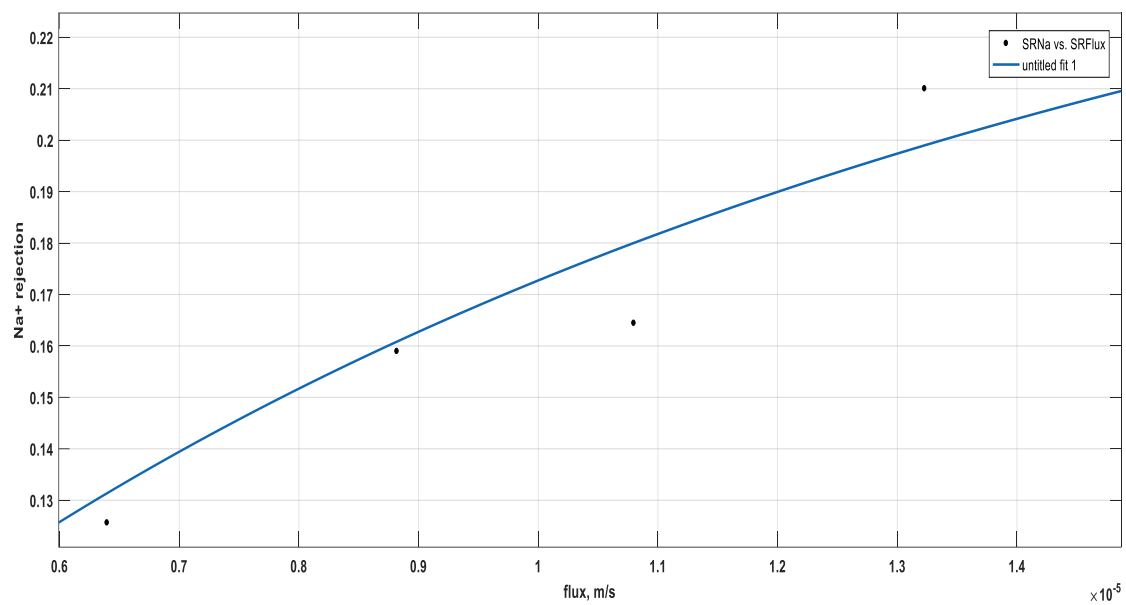

Figure S5. Rejection versus flux for Na<sup>+</sup> for SR 90

Fig

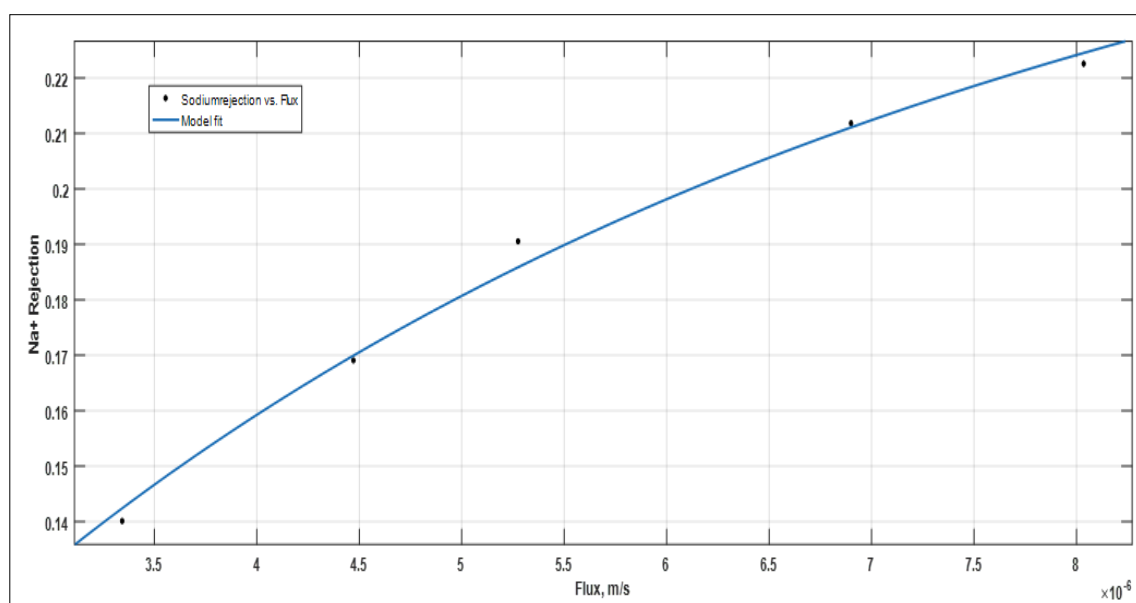

Figure S6. Rejection versus flux for Na<sup>+</sup> for NANO SW.

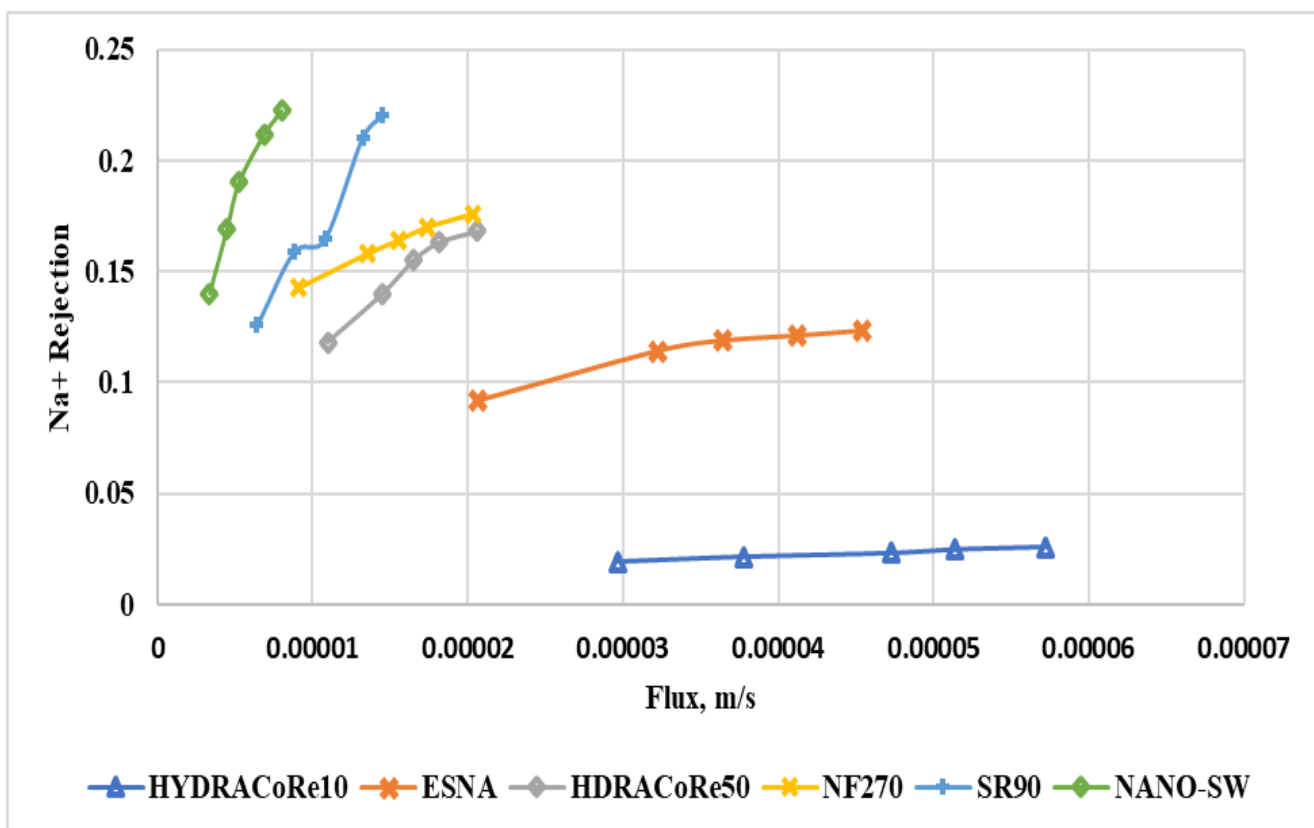

Figure S7. Rejection versus flux for Na<sup>+</sup> for all NF membranes.
